# Supplementary material
Source: publisher figshare collection journal article supplement (https://tandf.figshare.com/ndownloader/files/21642321)
Supplement: Supplementary file 1 [file 21642321]

SUPPLEMENTAL MATERIAL

S1. Statistics regarding the number of deforestation patches of SOSMA dataset before and after visual interpretation.

| Year | Before visual interpretation | After visual interpretation | | |
| --- | --- | --- | --- | --- |
| Count | Misclassifications | Plantation | Atlantic forest |
| 2007 | 2 | 0 | 0 | 2 |
| 2008 | 2 | 0 | 0 | 2 |
| 2009 | 0 | 0 | 0 | 0 |
| 2010 | 0 | 0 | 0 | 0 |
| 2011 | 1 | 0 | 0 | 1 |
| 2012 | 2 | 0 | 0 | 2 |
| 2013 | 0 | 0 | 0 | 0 |
| 2014 | 2 | 0 | 0 | 2 |
| 2015 | 5 | 0 | 0 | 5 |
| 2016 | 5 | 0 | 0 | 5 |
| Total | 19 | 0 | 0 | 19 (100%) |

S2. Statistics regarding the deforestation area of SOSMA dataset before and after visual interpretation.

| Year | Before visual interpretation | After visual interpretation | | |
| --- | --- | --- | --- | --- |
| Count | Misclassifications | Plantation | Count |
| 2007 | 44.55 | 0 | 0 | 44.55 |
| 2008 | 10.11 | 0 | 0 | 10.11 |
| 2009 | 0 | 0 | 0 | 0 |
| 2010 | 0 | 0 | 0 | 0 |
| 2011 | 7.85 | 0 | 0 | 7.85 |
| 2012 | 44.55 | 0 | 0 | 44.55 |
| 2013 | 0 | 0 | 0 | 0 |
| 2014 | 25.03 | 0 | 0 | 25.03 |
| 2015 | 45.57 | 0 | 0 | 45.57 |
| 2016 | 20.12 | 0 | 0 | 20.12 |
| Total | 197.78 | 0 | 0 | 197.78 (100%) |
